# Supplementary material
Source: publisher figshare collection journal article supplement (https://gsapubs.figshare.com/articles/dataset/_/21681695)
Supplement: Supplementary file 1 [file 1]

## Sheet: Table S2
Table S2. Zircon compositions of the early Eocene granite and Miocene porphyry in the Jiru porphyry Cu deposit.
Sample	Zircon no.	Minerals in zircon	zircon age	SiO2	Ti	Sr	Y	Nb	La	Ce	Pr	Nd	Sm	Eu	Gd	Tb	Dy	Ho	Er	Tm	Yb	Lu	Hf	Ta	Pb	Th	U	U (Initial)	Th/U	U/Yb	Ce/U	U/Ti	(Ce/U)*(U/Ti)^0.5	Ce/Ce*	Eu/Eu*	a(TiO2)	a(SiO2)	Ti-temperature(°C)	ΔFMQ
				wt%	ppm	ppm	ppm	ppm	ppm	ppm	ppm	ppm	ppm	ppm	ppm	ppm	ppm	ppm	ppm	ppm	ppm	ppm	ppm	ppm	ppm	ppm	ppm	ppm										°C
Early Eocene granite
JR-2	JR-2-2(Z)	apatite	48.6	30.2876	3.30426	0.338626	933.09	3.30069	0.0341784	21.6539	0.081568	1.01266	2.70557	0.441665	14.4737	4.80312	67.082	25.166	130.543	32.6263	365.405	56.5771	14703.7	1.89695	0.73443	425.168	526.374	534.333	0.807731	1.44052	0.0411378	159.301	0.51922	125.024	0.215685	0.7	1	679.794	1.14597
JR-2	JR-2-14(Z)	apatite	48.6	28.967	4.32	0.339	699	2.04	0.001	16.22	0.042	0.59	1.44	0.282	10.73	3.9	53.6	21.79	116.5	26.89	260.1	56.8	12540	1.191	2.76923	207.4	301.8	306.363	0.68721	1.16032	0.0537442	69.8611	0.44921	146.837	0.219238	0.7	1	702.338	0.894493
JR-2	JR-2-16(Z)	apatite and sulfide	48.6	31.217	3.69493	0.548753	1329.43	5.14386	0.0126974	24.089	0.0882849	1.45202	3.91382	0.745118	20.0603	6.97594	94.5672	34.7847	169.605	43.9529	603.307	60.3161	13732.8	1.63241	2.58649	544.758	533.284	541.348	1.02152	0.883935	0.045171	144.329	0.54267	97.8598	0.256983	0.7	1	689.065	1.22268
JR-2	JR-2-16(Z)	apatite and sulfide	48.6	31.2232	10.5509	0.470184	770.25	2.66446	0.0197411	15.2697	0.0456209	1.03737	2.47794	0.366603	12.8924	3.57747	55.5637	19.4129	99.6642	26.7959	353.949	36.1783	14907.1	1.15125	1.33634	207.664	334.886	339.949	0.620103	0.946141	0.0455967	31.7399	0.256883	76.9446	0.198213	0.7	1	785.797	-0.0758747
JR-2	JR-2-17(Z)	apatite and sulfide	48.6	31.0902	6.99081	0.501083	844.689	3.64391	0.374298	20.8361	0.104761	0.966605	2.02211	0.566512	10.8478	4.00013	61.3751	20.8034	111.47	29.7507	437.024	45.5945	15556.3	1.71718	1.58883	300.684	501.26	508.84	0.599857	1.14699	0.0415674	71.7028	0.351982	98.6847	0.369643	0.7	1	745.619	0.470989
JR-2	JR-2-6(Z)	apatite	48.6	28.5873	5.88935	0.350888	759.242	2.83775	0.0212767	18.5687	0.0419264	0.912727	2.53791	0.345827	11.6496	4.12498	56.453	21.5628	111.68	27.388	306.186	48.7916	14583.4	1.59916	0.941023	340.287	391.025	396.938	0.870243	1.27709	0.0474873	66.3953	0.386942	123.795	0.194363	0.7	1	729.769	0.63541
JR-2	JR-2-8(Z1)	apatite	48.6	31.3814	8.98474	0.49596	1249.07	3.17024	0.748056	27.7071	0.215198	2.36897	3.69343	0.646566	20.1963	6.8079	91.9888	34.9874	175.178	41.2489	439.434	67.3969	13929.8	1.17506	0.437716	191.18	210.545	213.729	0.908022	0.479128	0.131597	23.4337	0.637038	39.9051	0.228776	0.7	1	769.74	1.50105
JR-2	JR-2-8(Z2)	apatite	48.6	30.896	9.1366	0.713459	1285.55	4.50756	0.512335	32.752	0.210214	2.2859	3.44813	0.563759	17.8445	6.27952	89.3622	33.9611	170.592	40.7616	464.876	67.5902	13959.8	1.86798	0.525414	200.517	233.491	237.021	0.858779	0.502264	0.140271	25.5555	0.709106	47.2972	0.219633	0.7	1	771.392	1.68714
JR-2	JR-2-10(Z)	apatite	48.6	31.3417	4.42967	0.313945	978.411	2.68168	0.0059914	20.6713	0.0450565	0.712961	2.14648	0.530486	16.2163	5.09076	70.4785	28.1151	142.038	33.9349	377.813	59.894	14616.7	1.75173	0.826554	297.179	346.826	352.071	0.856853	0.917985	0.0596012	78.2962	0.527382	191.024	0.274778	0.7	1	704.501	1.17306
JR-2	JR-2-11(Z)	apatite	48.6	30.7261	3.02514	0.88458	1111.82	2.28005	1.09904	19.8488	0.340275	2.71318	3.47532	0.715436	18.8275	6.11107	83.3807	31.2758	157.524	37.5641	424.991	65.307	15355.4	1.37417	0.711075	302.413	375.895	381.579	0.804515	0.88448	0.0528041	124.257	0.588611	20.5068	0.270287	0.7	1	672.597	1.36377
JR-2	JR-2-14(Z)	apatite	48.6	28.7921	6.51432	0.332718	647.015	2.51146	0.00904291	16.7826	0.0290563	0.826901	1.64017	0.251461	10.0728	3.59199	51.2788	19.1765	97.8198	23.9419	262.753	42.2426	14910.3	1.3602	0.57811	264.796	372.14	377.767	0.71155	1.41631	0.0450975	57.1265	0.340856	88.0985	0.189059	0.7	1	739.032	0.415221
JR-11-B	JR-11-B-1(Z)	apatite	48.6	30.2603	10.5852	0.325068	541.482	1.95895	0.0161908	13.5663	0.01933	0.664883	1.26976	0.218423	9.0797	3.18095	43.8031	16.2198	84.2649	20.1049	212.399	34.095	14858.2	1.17444	0.571235	189.207	268.209	272.265	0.705444	1.26276	0.0505811	25.338	0.254609	85.2751	0.196584	0.7	1	786.126	-0.0913138
JR-11-B	JR-11-B-3(Z)	apatite	48.6	29.7453	6.36407	0.354906	1151.49	3.12702	0.150706	20.7198	0.11057	1.48702	3.9414	0.608533	21.9814	7.13885	93.7807	32.6612	156.689	34.5849	343.566	55.752	13922.1	1.44415	0.625449	1080.12	474.315	481.487	2.27722	1.38056	0.0436836	74.53	0.377124	80.8215	0.199792	0.7	1	736.874	0.590783
JR-11-B	JR-11-B-7(Z)	apatite	48.6	30.7031	13.9501	0.405581	1178.33	1.46542	0.0330901	11.2292	0.176028	2.85282	5.05997	0.808542	24.8403	7.53662	96.0484	33.6281	158.858	34.2408	353.921	53.8943	12856.6	0.804297	0.166964	241.123	244.693	248.393	0.985411	0.691378	0.0458911	17.5406	0.192199	15.2783	0.220393	0.7	1	814.91	-0.579564
JR-11-B	JR-11-B-11(Z)	apatite	48.6	30.6438	7.05919	0.272491	584.428	1.83517	0.0743102	12.7007	0.0439689	0.817425	1.8381	0.211116	9.67528	3.46252	44.4349	17.266	87.697	20.7875	217.589	34.9373	14607.6	1.08667	0.402111	181.285	232.52	236.036	0.779655	1.06862	0.0546218	32.9386	0.313486	76.4588	0.152986	0.7	1	746.534	0.269883
JR-11-B	JR11-B-15(Z)	apatite	48.6	31.3618	3.81752	0.431488	1129.78	1.75926	0.4524	18.9357	0.110148	1.40545	3.06237	0.558682	17.5089	6.24242	80.53	30.7001	154.953	35.4418	376.501	63.3263	14953.3	1.00543	0.646283	382.707	430.019	436.521	0.889978	1.14215	0.0440345	112.644	0.467354	64.2446	0.23316	0.7	1	691.807	0.963246
JR-11-B	JR11-B-14(Z)	apatite	48.6	27.6834	8.86	0.332	598	1.48	0.011	17	0.042	0.84	1.89	0.416	11.44	3.77	48.4	19	96.8	21.04	206	44	11230	0.756	1.91956	187.6	203.3	206.374	0.922774	0.986893	0.0836203	22.9458	0.400556	99.6505	0.273399	0.7	1	768.367	0.695448
JR-11-B	JR-11-B-E1(Z)	sulfide	48.6	30.7738	8.07718	0.268512	798.074	3.22105	0.0442693	16.1306	0.0228258	0.661244	1.80489	0.29319	11.5431	3.73916	50.4015	21.1381	109.861	28.8995	385.57	44.9143	17550	1.62794	1.19206	212.128	317.248	322.045	0.668649	0.822803	0.0508452	39.2771	0.318655	145.715	0.196295	0.7	1	759.366	0.298274
JR-11-B	JR-11-B-E2(Z)	sulfide	48.6	31.377	7.89127	0.373746	1178.6	6.11502	0	20.3589	0.0799941	1.05792	3.4467	0.535426	16.2276	5.46854	78.3722	30.5727	159.738	43.3864	617.925	66.6732	16814.4	2.7121	1.38532	299.42	528.363	536.353	0.566692	0.855061	0.038532	66.9555	0.315293	137.208	0.218786	0.7	1	757.125	0.27986
JR-11-B	JR-11-B-5(Z)	apatite	48.6	29.6474	7.57937	0.532379	1446.72	5.64825	0.342207	42.5974	0.116661	1.94795	3.53422	0.683687	21.6457	7.70181	104.159	38.7074	195.289	46.5359	491.746	79.6666	15140.9	2.75493	0.997728	871.269	571.238	579.875	1.52523	1.16165	0.0745704	75.3675	0.647379	86.8263	0.238876	0.7	1	753.266	1.52901
JR-11-B	JR-11-B-12(Z)	apatite and sulfide	48.6	29.6072	8.52445	0.758578	1602.77	2.58565	0	22.9513	0.0731704	1.55794	4.44921	0.919053	24.8194	8.49588	112.847	40.4939	207.074	51.331	666.115	73.238	17916.5	1.27076	1.75509	325.276	321.679	326.543	1.01118	0.482917	0.0713486	37.736	0.438292	92.0692	0.26727	0.7	1	764.591	0.851769
JR-2	JR-2-2	No-Ap	48.6	32.7313	12.0614	0.309923	668.649	0.970109	0.267751	14.9011	0.106559	1.17771	1.75508	0.416353	11.6399	3.93682	52.766	18.8244	96.6469	20.5234	218.491	39.2153	10542.7	0.563801		167.329	177.367	180.049	0.943401	0.811783	0.0840128	14.7054	0.322169	41.2635	0.281505	0.7	1	799.548	0.317317
JR-2	JR-2-5	No-Ap	48.6	32.7313	5.24168	0.0944517	686.399	2.31632	0.0167712	24.5702	0.015334	0.316957	1.31289	0.175926	9.02336	3.5672	47.5906	19.3124	105.476	23.8982	272.611	51.7746	12305.3	1.27165		194.366	266.517	270.547	0.729283	0.977645	0.0921901	50.8457	0.657372	702.692	0.156199	0.7	1	719.277	1.55561
JR-2	JR-2-6	No-Ap	48.6	32.7313	6.70137	0.103497	949.541	2.20302	0	26.7081	0.0617829	0.974584	2.16005	0.76412	13.4787	4.76296	62.9716	26.0524	142.674	34.7252	409.676	81.176	9252.11	0.992012		575.437	488.313	495.697	1.17842	1.19195	0.0546947	72.8677	0.466888	132.921	0.432766	0.7	1	741.663	0.961513
JR-2	JR-2-8	No-Ap	48.6	32.7313	4.18818	0.15675	958.186	3.21872	0	26.7667	0	1.07835	2.29129	0.357038	14.6127	5.31729	68.9752	27.2141	142.75	33.0955	384.295	73.7391	10908.6	1.66526		462.427	528.392	536.382	0.875159	1.37497	0.050657	126.163	0.56899	115.42	0.188563	0.7	1	699.677	1.30491
JR-2	JR-2-9	No-Ap	48.6	32.7313	3.85776	0.241817	1095.04	3.91935	0.0964657	32.3176	0.117632	1.3673	2.91148	0.586098	14.891	5.60333	75.7607	31.0005	162.815	39.7302	471.998	92.8035	12783.2	2.18564		492.901	767.706	779.314	0.642044	1.6265	0.0420963	199.003	0.593846	110.142	0.272018	0.7	1	692.691	1.37915
JR-2	JR-2-10	No-Ap	48.6	32.7313	5.38253	0.528763	1232.07	3.42177	1.01171	31.4804	0.35979	2.231	2.933	0.611415	17.4188	6.54903	85.3643	34.7799	183.987	42.995	480.009	90.1607	11717.9	1.82101		476.613	591.927	600.878	0.805187	1.23316	0.0531828	109.972	0.557715	40.5956	0.261408	0.7	1	721.646	1.27016
JR-2	JR-2-11	No-Ap	48.6	32.7313	2.45008	0.229547	1415.16	6.04624	0.148623	31.5467	0.0830329	0.806587	2.22395	0.311279	18.9747	6.85939	100.328	42.0888	218.15	49.5866	541	99.2608	11934.4	2.49147		706.571	999.535	1014.65	0.7069	1.84757	0.0315614	407.96	0.637478	235.996	0.146436	0.7	1	655.837	1.50225
JR-2	JR-2-13	No-Ap	48.6	32.7313	6.63212	0.134437	657.382	2.07346	0.268447	20.2547	0.100579	0.412975	1.66495	0.206965	9.22281	3.52868	47.4791	19.2787	101.576	22.8652	258.079	49.5154	11618.8	1.29254		252.72	377.8	383.513	0.668926	1.46389	0.0536122	56.9652	0.40464	432.719	0.161403	0.7	1	740.696	0.71306
JR-2	JR-2-14	No-Ap	48.6	32.7313	7.13351	0.135366	855.805	2.18843	0.0924839	21.7909	0.0991117	1.11322	1.88884	0.553089	13.1134	4.8688	60.9904	24.8897	128.718	29.6799	332.879	62.7891	11233.8	1.34961		365.355	456.347	463.247	0.800607	1.37091	0.0477508	63.9722	0.381923	72.6837	0.339616	0.7	1	747.52	0.61274
JR-2	JR-2-16	No-Ap	48.6	32.7313	7.35275	0.207899	808.187	2.66759	0	29.1873	0.0771166	0.705317	1.51279	0.279446	11.1581	4.3503	57.9033	24.0343	122.959	28.2504	314.226	58.7256	12147.3	1.404		195.663	280.677	284.921	0.697111	0.893231	0.103989	38.173	0.642489	194.236	0.207856	0.7	1	750.381	1.51585
JR-2	JR-2-21	No-Ap	48.6	32.7313	8.23611	0.362814	1446.85	1.55227	0.0429811	26.1905	0.0548646	1.82384	5.07033	1.06978	27.4721	8.491	111.729	42.2563	211.365	47.3826	512.086	92.1169	11221.6	0.997197		418.694	400.346	406.4	1.04583	0.781795	0.0654197	48.6086	0.456106	87.3645	0.277	0.7	1	761.249	0.920943
JR-2	JR-2-22	No-Ap	48.6	32.7313	5.16437	0.234209	797.557	2.37232	0.0541175	22.0624	0	0.656991	1.94899	0.358124	13.2602	4.57162	58.9634	23.2699	120.011	26.8555	299.844	55.9884	11655	1.21028		309.702	397.652	403.665	0.778827	1.3262	0.0554816	76.9993	0.486847	218.006	0.215279	0.7	1	717.955	1.03419
JR-2	JR-2-23	No-Ap	39.6562	32.7313	6.49429	0.770797	3512.07	21.216	1.44702	152.282	0.493838	5.95173	11.6985	1.78528	64.566	21.9444	272.653	101.483	498.781	109.062	1172.93	208.524	12573.3	8.22159		4527.64	5144.93	5215.2	0.88002	4.38637	0.0295985	792.223	0.833092	110.057	0.198513	0.7	1	738.747	1.96693
JR-2	JR-2-1	No-Ap	50.6312	32.7313	4.68809	0.520094	857.111	1.771	1.92389	19.7313	0.523452	2.53134	2.17818	0.407725	12.6652	4.24435	59.8072	24.6126	129.371	30.5618	358.041	65.9226	11252.8	1.15614		183.699	297.284	301.878	0.617924	0.830307	0.0663719	63.4126	0.528533	14.6783	0.237226	0.7	1	709.429	1.17684
JR-2	JR-2-3	No-Ap	47.6771	32.7313	6.2399	1.4111	906.75	2.53253	3.80494	30.6911	1.12821	5.47785	3.10224	0.676645	13.4969	4.91622	65.5399	26.6671	137.76	31.0926	352.954	65.4213	11393.7	1.46741		311.307	400.293	406.285	0.777699	1.13412	0.0766716	64.1505	0.614093	6.94376	0.319561	0.7	1	735.058	1.43736
JR-2	JR-2-4	No-Ap	47.6034	32.7313	5.80896	11.4833	1540.39	2.05261	28.6938	88.2195	7.67484	33.835	9.95823	1.15857	32.8708	9.83752	120.466	45.4616	223.241	49.3889	530.203	95.8563	11262.1	1.02333		471.121	459.068	465.935	1.02625	0.865835	0.192171	79.0276	1.70835	1.67935	0.195693	0.7	1	728.52	3.21384
JR-2	JR-2-7	No-Ap	50.4117	32.7313	22.4994	3.4317	869.517	2.16337	8.37007	38.6674	1.9356	8.42348	3.40223	0.706657	13.7603	4.73493	64.0567	25.0747	129.182	29.3003	331.352	62.5865	10963.4	1.10243		312.95	361.429	367.002	0.865868	1.09077	0.106985	16.0639	0.428793	4.05745	0.315617	0.7	1	868.64	0.813728
JR-2	JR-2-12	No-Ap	48.4977	32.7313	3.4232	1.44153	886.011	2.69061	4.15588	31.6853	1.00157	5.69204	2.77523	0.551194	13.287	4.68588	61.8474	25.5818	133.856	31.5164	351.764	66.9489	11131.3	1.50297		329.056	418.319	424.638	0.786615	1.18921	0.0757442	122.201	0.837311	5.93946	0.277389	0.7	1	682.708	1.9757
JR-2	JR-2-17	No-Ap	49.7649	32.7313	8.07067	0.216117	1143.18	2.37048	1.87309	26.0035	0.539812	3.93378	3.45475	0.673969	18.883	6.66813	87.9742	33.5794	166.731	36.0876	399.352	73.2739	11064.1	1.20674		368.913	418.28	424.684	0.881976	1.0474	0.0621676	51.8272	0.447551	12.7044	0.255002	0.7	1	759.288	0.88807
JR-2	JR-2-18	No-Ap	48.8874	32.7313	3.48283	0.476713	798.108	2.32706	4.10202	26.9309	0.684345	2.95721	2.19286	0.355358	10.9254	4.11874	58.5907	22.774	121.434	28.4319	327.04	62.1933	11767.5	1.4603		287.256	387.598	393.477	0.741119	1.18517	0.0694815	111.288	0.732983	14.7783	0.221865	0.7	1	684.138	1.74465
JR-2	JR-2-19	No-Ap	49.8127	32.7313	0.929861	0.00349651	1482.73	2.09523	0	46.8085	0.113381	0.78546	3.05644	0.553629	21.0646	7.52898	109.54	44.2972	226.57	49.6336	553.025	101.806	11680.9	1.16035		429.854	391.755	397.756	1.09725	0.708385	0.119484	421.305	2.4525	507.481	0.210854	0.7	1	585.883	3.84165
JR-2	JR-2-3(Z)	apatite	48.5	30.167	10.4995	0.703023	5384.13	24.721	0.0337638	186.455	0.326228	6.68677	17.5532	2.2864	88.683	27.688	350.462	121.061	564.603	125.103	1371.02	187.35	13851.8	9.26707	5.20551	6076.33	3155.04	3202.69	1.92591	2.30124	0.0590974	300.496	1.02444	160.185	0.177093	0.7	1	785.3	2.32593
JR-2	JR-2-13(Z)	apatite	48.5	28.6461	4.08	0.97	640	1.87	1.5	20	0.42	2.48	1.97	0.317	10.53	3.65	48.3	19.49	105.9	23.84	233.8	53	12330	1.091	2.87172	225	292.7	297.121	0.768705	1.25192	0.0683293	71.7402	0.578747	14.0191	0.212696	0.7	1	697.442	1.33443
JR-2	JR-2-15(Z)	apatite and sulfide	48.5	32.1328	8.48163	1.44377	700.376	1.4067	10.9017	26.8443	1.30352	5.98174	3.14374	0.633543	14.3344	3.98096	52.7213	18.856	101.983	30.6116	557.357	47.9942	13654.7	0.970991	1.89073	270.997	745.678	756.941	0.363424	1.33788	0.0359999	87.9169	0.337549	5.16145	0.288411	0.7	1	764.101	0.398291
JR-11-B	JR-11-B-2(Z)	apatite	48.5	30.2562	5.05543	0.629249	1177.49	1.79125	1.2364	21.8024	0.406708	3.22434	4.78744	1.04618	21.7393	7.09408	91.9361	32.8738	159.644	36.507	390.143	60.2552	13739.3	1.10397	0.409162	240.736	202.219	205.273	1.19048	0.518319	0.107816	40.0003	0.681891	21.9712	0.313387	0.7	1	716.063	1.61919
JR-11-B	JR-11-B-6(Z)	apatite	48.5	29.3041	9.28631	0.771246	538.413	1.5917	2.03243	15.4877	0.579666	3.39772	1.95284	0.240526	9.2918	3.15439	41.2975	15.8104	77.0054	18.4618	200.256	31.9837	13981	0.860391	0.385844	138.931	187.257	190.086	0.741927	0.935087	0.0827083	20.1649	0.371404	5.73332	0.172554	0.7	1	772.999	0.564248
JR-11-B	JR-11-B-9(Z)	apatite	48.5	29.5489	70.5966	3.73029	850.137	3.63292	8.85702	35.7413	2.00291	9.80162	3.09067	0.449361	11.8261	4.24215	59.6921	23.316	126.147	32.2014	352.516	59.186	14963.2	1.93717	0.645292	224.163	320.649	325.493	0.699089	0.909602	0.111465	4.54199	0.237554	2.51626	0.227141	0.7	1	1021.59	-0.211699
JR-11-B	JR11-B-14(Z)	apatite	48.5	30.1759	7.65971	2.34258	634.573	1.90424	6.73216	30.3191	1.91979	8.90498	4.00427	0.424699	12.3312	3.72412	49.8251	17.4186	86.625	19.9163	211.367	33.7321	12192.5	0.750598	0.15156	207.291	189.443	192.305	1.09421	0.896278	0.160043	24.7324	0.795921	3.35043	0.184699	0.7	1	754.272	1.88768
JR-11-B	JR-11-B-R3(Z)	sulfide	48.5	28.6957	3.62877	1.0298	1210.27	4.73042	2.83066	23.8361	0.588573	3.71636	3.94764	0.434845	18.6289	5.68697	81.8396	29.6627	164.855	41.885	577.17	68.3471	17015.4	2.33732	1.28897	280.593	394.618	400.578	0.711051	0.683711	0.0604031	108.747	0.629894	14.9096	0.15496	0.7	1	687.554	1.48147
JR-11-B	JR-11-B-4(Z)	apatite		30.721	0.751256	0.274742	174.017	0.818041	0	6.82311	0.00996324	0.0616919	0.138304	0.0971589	1.16475	0.534749	9.17155	4.5906	29.8299	9.60903	139.285	33.7868	17824.6	0.462872	0.950945	90.7918	469.711	473.093	0.193293	3.3723	0.0145262	625.234	0.363223	542.609	0.739769	0.7	1	571.874	0.525572
Miocene porphyry																												0
JR-11-3	JR-11-3-1(Z)	apatite	15.2	28.7149	6.22368	0.605687	458.003	3.49242	0.88286	65.5505	0.362456	4.76292	6.66156	1.59549	22.9246	5.11271	48.9356	13.7845	53.022	10.3381	103.691	17.4663	13147.2	0.743733	0.535427	2336.98	883.759	892.304	2.64436	8.52301	0.0741724	141.999	0.883864	42.1242	0.394551	0.7	1	734.819	2.06965
JR-11-3	JR-11-3-4(Z)	apatite	15.2	28.2114	4.29279	1.13668	1373	3.00033	0.566139	55.6019	0.243164	2.82181	5.20266	2.12496	29.8495	8.72719	102.35	36.0551	164.505	35.3946	340.483	58.5062	14019.6	0.751762	0.979506	996.202	742.292	749.47	1.34206	2.18011	0.0749057	172.916	0.984992	79.5034	0.521094	0.7	1	701.794	2.25774
JR-11-3	JR-11-3-7(Z1)	apatite	15.2	29.3949	4.13	0.396	817	2.12	0	43.6	0.058	1.01	3.16	1.42	18.5	6.18	72.6	25.7	123.1	25.5	247	53.6	12490	0.485	2.15564	503	652	658.304	0.771472	2.63968	0.0668712	157.869	0.84021	295.568	0.567553	0.7	1	698.481	1.9817
JR-11-3	JR-11-3-8(Z)	apatite	15.2	29.1382	1.53	0.278	381	0.394	0	15.9	0.015	0.365	0.85	0.474	5.66	1.84	24	9.95	55.6	13.7	150	39.3	12410	0.114	1.23445	218	431	435.167	0.5058	2.87333	0.036891	281.699	0.619174	222.002	0.660402	0.7	1	620.471	1.45167
JR-11-3	JR-11-3-9(Z)	apatite	15.2	30.8286	2.45649	0.325396	786.644	2.37435	0	40.1025	0.0572415	1.24958	3.75765	1.86028	19.8115	5.88127	65.0196	21.1683	92.7826	19.9666	208.167	31.9032	13606.2	0.649442	0.073178	685.352	651.792	658.094	1.05149	3.1311	0.0615265	265.335	1.00221	211.197	0.658883	0.7	1	656.041	2.28784
JR-11-3	JR-11-3-12(Z)	apatite	15.2	31.5343	3.9	0.413	1010	2.49	0.014	47.4	0.051	1.27	3.75	1.4	23.5	7.21	82	30.33	146.2	30.7	296	65.5	11910	0.494	2.40644	608	831	839.035	0.731649	2.80743	0.0570397	213.077	0.832617	241.173	0.455749	0.7	1	693.611	1.96594
JR-11-3	JR-11-3-14(Z)	apatite	15.2	28.8063	1.57788	0.261029	476.319	1.47282	0.00949278	23.4652	0.0363167	0.501913	1.39978	0.676202	8.60795	2.50927	32.5617	12.4191	59.7004	15.1676	169.283	32.1014	13494.6	0.385122	0.481394	311.109	530.192	535.318	0.586785	3.13199	0.0442579	336.015	0.81128	285.333	0.595313	0.7	1	622.703	1.92086
JR-11-3	JR-11-3-17(Z)	apatite	15.2	29.4728	4.47556	0.296153	1121.76	4.13732	0.0340061	82.8053	0.233825	4.74116	11.1976	3.55812	40.7417	10.3044	101.612	30.6135	128.801	26.1257	253.206	39.8658	12278.8	0.78255	0.674448	1921.78	981.71	991.203	1.95758	3.87712	0.084348	219.349	1.24923	90.2698	0.50908	0.7	1	705.393	2.67038
JR-11-3	JR11-3-26(Z)	apatite	15.2	29.929	1.74116	0.708245	263.296	0.895412	0.206603	12.8441	0.0754428	0.871507	1.03015	0.488353	5.88312	1.66783	20.8678	7.2583	35.83	8.49158	94.0921	16.2779	14934.1	0.260653	0.24599	125.826	275.561	278.226	0.456616	2.92863	0.0466107	158.263	0.586374	38.123	0.606217	0.7	1	629.911	1.35716
JR-11-3	JR11-3-27(Z)	apatite	15.2	29.4015	1.68316	0.655982	395.788	3.11987	0.918108	44.5455	0.290759	3.03725	4.23039	0.967112	15.5013	3.85224	39.6204	11.4389	47.8471	9.47039	94.6513	16.276	12324	0.663125	0.602149	1407.3	744.152	751.348	1.89114	7.86204	0.0598607	442.116	1.25866	44.7045	0.364964	0.7	1	627.418	2.68344
JR-11-3	JR-11-3-M1(Z)	sulfide	15.2	29.57	1.42384	0.222826	518.242	1.53077	0	20.7262	0.00702977	0.777916	1.9957	0.76061	10.7952	3.01968	35.7951	12.6304	66.8396	17.9246	264.035	32.9954	17190.3	0.377822	0.546431	320.747	643.641	649.864	0.498332	2.43771	0.0322015	452.046	0.684649	149.581	0.500781	0.7	1	615.305	1.6262
JR-11-3	JR-11-3-7(Z2)	apatite	15.2	29.7424	1.33097	0.251484	495.217	1.94224	0.0331933	29.7935	0.165901	2.89114	4.40545	1.06373	16.948	4.07354	43.5268	13.927	62.3645	14.2418	154.444	25.7823	13293.5	0.352363	0	745.107	560.446	565.865	1.32949	3.6288	0.0531602	421.079	1.09086	34.3637	0.376205	0.7	1	610.514	2.435
JR-11-3	JR-11-3-8(Z)	apatite	15.2	30.5183	1.26935	0.228691	298.671	0.933371	0.00987117	15.6256	0.0135038	0.22429	0.707094	0.428675	5.51368	1.64677	21.4265	8.05799	40.3374	10.4183	122.019	22.1881	14419.6	0.204386	0	198.746	417.045	421.078	0.476558	3.41788	0.0374674	328.549	0.679132	480.642	0.663462	0.7	1	607.178	1.61215
JR-11-3	JR-11-3-12(Z)	apatite	15.2	29.9324	1.36569	0.403427	446.276	1.73367	0	28.4844	0.0466497	0.80725	2.30511	0.919165	11.3779	3.14076	37.061	12.8776	59.1005	13.3895	135.856	22.7858	13437.8	0.365706	0.355619	712.436	691.371	698.056	1.03047	5.08901	0.0411999	506.244	0.926992	220.501	0.548485	0.7	1	612.337	2.15237
JR-11-3	JR-11-3-11(Z)	apatite	15.2	29.7083	0.843	0.193491	487.604	0.951545	0.0286481	13.7161	0.0677947	1.18025	3.19159	1.51296	13.8191	3.51466	36.5863	12.3982	59.6089	14.8073	169.036	31.7074	14314.2	0.206985	0.417437	218.716	428.025	432.163	0.510988	2.53215	0.0320452	507.74	0.722077	68.7725	0.696197	0.7	1	579.385	1.71862
JR-11-3	JR-11-3-16(Z1)	apatite	15.2	28.5351	0.709903	0.338943	585.873	1.29067	0.0308575	22.3908	0.0348977	0.492717	1.37732	0.696228	10.2849	3.03093	38.9706	14.5887	75.9542	17.6737	188.999	40.3384	14661.6	0.290175	0.887056	320.018	497.353	502.163	0.643442	2.63152	0.0450199	700.593	1.19162	277.995	0.565304	0.7	1	568.232	2.5884
JR-11-3	JR-11-3-16(Z2)	apatite	15.2	29.7345	1.19831	0.196646	597.753	1.08302	0.0141307	17.5855	0.0409464	0.911499	2.78213	1.0062	12.7358	3.58293	46.1882	16.861	80.1408	19.2174	212.623	37.0154	12865.1	0.19249	0.243687	272.403	487.933	492.651	0.558279	2.29482	0.0360409	407.184	0.727261	128.869	0.51657	0.7	1	603.158	1.73104
JR-11-3	JR11-3-20(Z)	apatite	15.2	29.6647	1.66804	0.26445	441.056	1.31561	0	18.3888	0.0133947	0.389234	2.03334	0.566909	7.7028	2.49202	33.3928	12.208	60.9509	14.4823	159.641	28.726	13821.8	0.304967	0.215125	219.751	379.422	383.091	0.579174	2.37672	0.0484653	227.466	0.730953	540.094	0.437756	0.7	1	626.756	1.73983
JR-11-3	JR11-3-19	apatite	15.2	29.7548	6.84028	0.43698	2223.2	8.46911	0.05896	156.719	0.477568	10.4974	21.2218	6.41421	79.867	19.0577	197.232	56.9337	231.897	45.6456	416.239	59.5761	12267.9	1.77157	0.712894	3394.37	1258.61	1270.78	2.69693	3.02376	0.124518	184	1.68904	66.0486	0.47612	0.7	1	743.578	3.19411
JR901-421	JR901-420-5(Z)	apatite	15.2	29.0098	2.54	0.304	838	1.05	0.021	30.3	0.166	3.17	6.39	2.39	28.5	7.9	83.2	27.5	123.6	24.52	214	44	10980	0.389	1.04329	268	359	362.471	0.746518	1.67757	0.0844011	141.339	1.00341	42.165	0.541218	0.7	1	658.66	2.28991
JR901-420	JR901-420-7(Z)	apatite	15.2	28.135	1.78733	0.208179	668.325	1.68034	0	17.9886	0.0199261	0.467205	1.37321	0.866258	10.2807	3.65405	46.7603	18.2702	91.8171	20.3807	207.391	42.755	14413.6	0.415564	0.279342	181.246	299.273	302.167	0.605622	1.44304	0.0601075	167.442	0.777788	247.654	0.704556	0.7	1	631.845	1.84766
JR901-420	JR901-420-9(Z)	apatite	15.2	29.8256	4.91565	0.317822	853.448	2.93821	0.0270107	59.5633	0.0888488	2.33007	5.12182	1.92009	24.7573	6.60452	72.3212	23.135	104.156	22.4064	230.292	36.4685	13640.8	0.603386	0.655934	1961.52	1059.78	1070.02	1.85088	4.60189	0.0562036	215.592	0.825241	122.968	0.521081	0.7	1	713.587	1.95049
JR901-420	JR901-420-10(Z)	apatite	15.2	28.2183	3.18	0.296	719	1.82	0	34.2	0	0.82	2.6	1.13	15.7	5.12	62	22.9	109.5	23.4	212	43.8	12370	0.5	1.18893	269	448	452.332	0.600446	2.11321	0.0763393	140.881	0.906095	289.4	0.540492	0.7	1	676.655	2.11278
JR901-420	JR901-420-11(Z)	apatite	15.2	31.3418	0.512336	0.256473	628.071	1.27038	0.016587	24.1026	0.0372226	0.76598	1.78599	0.916647	10.8349	3.38684	42.3144	16.1835	80.9132	19.7781	227.874	41.3806	13568.6	0.191413	0.138426	402.124	601.606	607.423	0.668417	2.64008	0.0400638	1174.24	1.37288	160.56	0.636792	0.7	1	547.848	2.83425
JR901-420	JR901-420-13(Z)	apatite	15.2	28.8387	2.15	0.298	407	1.17	0.016	22.9	0.034	0.77	2.24	0.743	11.3	3.3	35.9	12.46	58.8	12.3	123.1	28.4	12220	0.358	0.908068	239	328	331.172	0.728659	2.6645	0.0698171	152.558	0.862342	189.334	0.451308	0.7	1	645.746	2.02685
JR901-420	JR901-420-2(Z)	apatite	15.2	30.5598	2.16079	0.260801	662.928	1.07489	0.0121748	23.6556	0.033668	1.01648	2.36682	1.08181	12.3421	3.71428	45.7265	17.54	87.0589	20.8812	244.608	43.9663	13968.4	0.197621	0.286169	316.603	539.129	544.342	0.58725	2.20405	0.0438775	249.505	0.693077	118.585	0.611672	0.7	1	646.129	1.64745
JR901-420	JR901-420-4(Z2)	apatite	15.2	29.2994	1.55099	0.283223	828.289	3.37331	0.0902557	27.0155	0.0321805	0.864171	1.75255	0.395349	12.0483	4.29826	59.96	23.9226	126.116	30.6681	333.368	55.027	15280.4	1.59336	0.687988	288.826	315.183	318.23	0.916375	0.94545	0.0857138	203.214	1.22188	138.743	0.262924	0.7	1	621.456	2.63194
JR901-420	JR901-420-5(Z)	apatite	15.2	31.5563	4.00956	0.229784	889.548	1.90862	0.00149734	33.0331	0.0740041	1.49538	4.40898	1.64835	21.7606	6.29067	75.9313	25.1527	114.634	24.6274	249.463	39.7821	13097.7	0.685055	0.3819	436.262	516.139	521.129	0.845243	2.069	0.0640004	128.727	0.726136	142.531	0.514273	0.7	1	695.959	1.72835
JR901-420	JR901-420-6(Z)	apatite	15.2	30.8355	2.26744	0.222514	711.159	1.21049	0.0399732	22.596	0.0537356	1.66541	3.77443	1.447	16.8671	4.87592	58.857	20.701	95.4427	22.4815	237.125	39.43	13760.3	0.355038	0.190712	258.108	381.996	385.69	0.675682	1.61095	0.0591525	168.47	0.767777	67.293	0.554204	0.7	1	649.827	1.82517
JR901-420	JR901-420-8(Z2)	apatite	15.2	29.9105	1.62362	0.346788	255.917	1.0186	0.156448	17.135	0.106053	1.21408	1.99806	0.525761	7.47439	2.0563	22.9287	7.21453	33.6121	7.66406	80.1323	13.3622	14659.9	0.260787	0.203994	900.915	330.327	333.521	2.72734	4.12227	0.0518727	203.451	0.739893	50.8303	0.41576	0.7	1	624.782	1.76094
JR901-420	JR901-420-13(Z)	apatite	15.2	28.8687	1.92049	0.278925	555.308	1.83294	0.0175341	22.5151	0.0286144	0.950435	1.35701	0.87598	12.1705	3.91673	45.0553	15.423	75.3299	17.7661	198.195	35.8802	13908	0.454509	0.202228	365.571	511.471	516.416	0.714745	2.58064	0.0440203	266.322	0.718384	74.0182	0.658713	0.7	1	637.202	1.70971
JR901-420	JR901-420-14(Z)	apatite	15.2	28.9879	1.2	0.264893	260.003	0.910121	0.0295288	16.6235	0.0390612	0.472108	1.21324	0.420222	5.68342	1.6314	19.4992	6.88508	36.208	9.36962	108.184	19.8401	14042.1	0.270956	0.404876	320.984	497.919	502.733	0.644652	4.60251	0.0333859	414.932	0.680067	198.022	0.489043	0.7	1	603.255	1.61454
JR901-420	JR901-420-1(Z)	apatite	15.2	29.7228	0.88	0.178775	433.551	1.55063	0.0136411	19.5379	0.0340174	0.529361	1.69207	0.707836	8.7473	2.83681	32.4478	11.8749	60.3344	14.5004	161.746	28.8905	15640.7	0.553529	0.519518	641.022	985.833	995.365	0.650234	6.09494	0.0198187	1120.26	0.663338	258.179	0.562255	0.7	1	582.219	1.5713
JR901-420	JR901-420-3(Z)	apatite	15.2	29.2357	1.921	0.208402	467.832	1.5611	0.00881712	28.7231	0.0122498	0.871226	2.46766	0.962602	12.4662	3.62085	41.0897	13.7566	64.1774	14.4654	150.225	25.573	13994.7	0.477474	0.188851	443.394	630.011	636.103	0.703788	4.19378	0.0455915	327.96	0.825646	204.354	0.530376	0.7	1	637.222	1.95134
JR901-420	JR901-420-10(Z)	apatite	15.2	30.9782	0	0.355951	872.184	1.35348	0.0416857	24.7066	0.218905	3.60997	5.84116	2.33319	24.8521	6.91045	76.4957	24.1496	106.571	22.9625	223.882	34.7903	14434.2	0.470797	0.266424	461.947	402.448	406.339	1.14784	1.79759	0.0613908			24.2344	0.591788	0.7	1
JR901-420	JR901-420-12(Z)	apatite	15.2	29.63	0	0.24812	500.932	1.54029	0.0745187	22.9701	0.0246815	0.784667	1.34882	0.918262	9.82078	2.94369	38.6441	14.4911	67.5346	15.5593	172.921	31.0319	14335.8	0.285137	0.349578	320.423	484.995	489.685	0.660672	2.80471	0.0473616			110.122	0.771019	0.7	1
JR901-420	JR901-420-16(Z)	apatite	15.2	31.6406	1.0831	0.280801	462.237	1.36646	0.0138987	21.9925	0.0245753	0.68425	1.69815	0.895894	11.5203	3.37614	40.4117	14.1533	64.6067	14.2186	144.037	24.6827	13561.8	0.382856	0.0467009	232.309	334.586	337.822	0.694317	2.32292	0.0657305	308.915	1.15528	174.561	0.618991	0.7	1	596.19	2.53462
JR901-420	JR901-420-R1	apatite	15.2	30.44	5.80347	3.18665	413.067	2.02622	6.93723	37.4668	1.46495	11.428	7.85488	1.76952	20.0594	3.71269	42.4049	11.9005	48.1437	10.1785	125.116	13.3894	15545	0.657683	0.536486	298.171	355.223	358.658	0.839391	2.83914	0.105474	61.2087	0.825187	4.93147	0.430798	0.7	1	728.434	1.95038
JR-11-3	JR-11-3-10(Z)	apatite	15.2	31.0091	3.45355	8.28907	374.73	1.38481	6.14679	37.0297	1.71747	8.28616	3.14713	0.972448	10.4837	2.95086	33.163	10.9697	48.8296	11.3604	116.631	19.3466	13905	0.418791	0.237022	448.706	521.348	526.389	0.860666	4.47007	0.0710269	150.96	0.872678	3.71438	0.517367	0.7	1	683.438	2.04753
JR-11-3	JR-11-3-3(Z)	apatite	15.2	30.9139	15.1517	0.324905	973.403	1.62852	0.0384047	9.59112	0.100835	1.72746	3.19371	0.453256	17.9414	5.91304	75.7464	26.7071	127.557	28.5716	280.454	45.3253	11225.9	0.520331	1.62918	149.243	180.934	182.684	0.824848	0.645148	0.0530089	11.9415	0.18318	22.4634	0.182985	0.7	1	823.833	-0.663012
JR-11-3	JR-11-3-9(Z)	apatite	15.2	29.75	1.81777	4.71481	523.118	1.39412	4.06839	20.6703	0.873777	5.06542	2.05194	1.14705	9.05933	2.63871	30.5144	12.0231	64.0419	18.2941	275.164	36.9543	17512.5	0.164225	0.417879	210.145	463.117	467.595	0.453762	1.68306	0.0446329	254.773	0.712413	3.61749	0.813014	0.7	1	633.099	1.69522
JR901-420	JR901-420-8(Z1)	apatite	15.2	30.7545	1.44516	8.17722	257.745	0.871481	3.17969	16.0121	0.563433	2.86195	1.27718	0.593956	6.22557	1.64908	21.2283	7.21721	33.5832	8.27909	85.5827	14.7331	14488.4	0.303438	0.841295	89.0137	165.201	166.798	0.538821	1.93031	0.0969252	114.313	1.0363	5.46392	0.643704	0.7	1	616.368	2.34591
Standard of zircon trace element
					Ti	Sr	Y	Nb	La	Ce	Pr	Nd	Sm	Eu	Gd	Tb	Dy	Ho	Er	Tm	Yb	Lu	Hf	Ta	Pb	Th	U
					ppm	ppm	ppm	ppm	ppm	ppm	ppm	ppm	ppm	ppm	ppm	ppm	ppm	ppm	ppm	ppm	ppm	ppm	ppm	ppm	ppm	ppm	ppm
NIST610-1					436.85	490.564	441.141	433.393	433.951	420.885	425.986	420.814	436.253	410.043	402.945	412.438	404.545	433.984	411.772	416.281	424.087	413.14	395.997	441.101	390.275	436.354	376.97
NIST610-2					453.519	527.283	479.578	461.639	458.754	455.959	439.934	444.715	474.207	464.19	454.347	461.944	458.161	471.314	460.773	460.688	470.51	456.218	448.838	488.594	426.338	484.865	422.219
NIST610-3					489.007	539.803	461.994	473.126	487.765	465.516	446.181	464.916	470.048	491.828	483.824	454.833	443.157	505.039	462.015	458.153	474.542	468.476	480.055	494.342	457.687	514.308	463.968
NIST610-4					452.156	518.751	457.415	405.227	440.003	429.271	443.402	432.233	434.556	447.663	434.19	450.133	430.3	452.32	435.08	446.97	452.928	456.964	456.413	462.227	417.309	455.927	451.428
NIST610-5					456.254	516.048	469.079	419.953	443.031	424.371	431.84	437.077	453.663	470.565	438.245	450.684	440.99	448.634	440.432	433.839	473.11	445.14	471.542	463.697	437.461	461.597	464.547
NIST610-6					475.784	538.452	469.332	407.242	469.785	456.93	456.377	456.748	465.668	478.393	443.214	447.148	420.436	428.655	437.922	421.277	453.502	441.016	463.768	477.973	418.39	467.713	468.651
NIST610-7					455	508	463	464	437	451	443	426	448	445	441	434	432	445	451	432	448	437	428	444	417.299	457	459
NIST610-8					450	526	467	474	446	455	450	428	460	448	448	436	441	453	458	437	452	444	448	457	424.643	461	469
NIST610-9					457	515	460	464	440	459	452	434.3	457	450	453	441	439	451	459	436	450	441	434	445	422.552	461	464
NIST610-10					446	516	456	459	434	449	446	430	449	443	449	434	431	445	450	433	443	432	433	440	416.198	450	457
NIST610-11					460	521	471	476	448	455	452	433	457	451	458	446	444	459	463	445	462	444	438	450	422.828	461	464
NIST610-12					440	513	459	459	437	452	444	431	452	445	449	432	438	447	451	432	450	441	437	445	421.67	458	460
Average					455.964	519.158	462.878	449.715	447.941	447.828	444.227	436.567	454.783	453.723	446.23	441.682	435.216	453.329	448.333	437.684	454.473	443.329	444.551	459.078	422.721	464.064	451.732
σ					14.3923	13.2522	9.60929	26.0887	16.4135	14.5816	8.61076	12.8683	12.0859	20.7136	18.5883	13.0879	13.3723	19.5867	14.9681	13.2109	14.1749	13.7662	22.3717	18.8308	15.4642	19.3608	26.6438
Pearce et al. (1996)					437.3	512	469.6	432.17	432.5	430.3	462.9	426.1	449.4	442.7	425.2	454.8	439	460.3	439.2	422.6	450.6	439.7	440	340.13	419	454	464
References：
Pearce, N.J.G., Perkin, W.T., Westgate, J.A., Gorton, M.P., Jackson, S.E., Neal, C.R., and Chenery, S.P., 1997, A compilation of new and published major and trace element data for NIST SRM 610 and NIST SRM 612 glass reference materials: Geostandards Newsletter, v. 21, p. 115–144.
