# Supplementary material
Source: publisher figshare collection journal article supplement (https://gsapubs.figshare.com/articles/dataset/_/21681695)
Supplement: Supplementary file 1 [file 1]

Xiang Sun, Jun Deng, Yongjun Lu, Xiaobo Si, Pete Hollings, M. Santosh, Qiang Li, and Xu Zheng, 2022, Two stages of porphyry Cu mineralization at Jiru in the Tibetan collisional orogen: Insights from zircon, apatite, and magmatic sulfides: GSA Bulletin, <https://doi.org/10.1130/B36741.1>.

## Supplemental Material

**Table S1.** Electron microprobe analysis (EPMA) data for the Durango apatite standards in comparison with published values.

**Table S2.** Zircon compositions of the early Eocene granite and Miocene porphyry in the Jiru porphyry Cu deposit.

**Table S3.** Compositions of zircon-hosted apatites in the early Eocene granite and Miocene porphyry at Jiru.

**Table S4.** Compositions of biotite-hosted apatites in the early Eocene granite and Miocene porphyry at Jiru.

**Table S5.** Apatite and zircon saturation temperatures and Ti-in-zircon temperature of the early Eocene granite and Miocene porphyry at Jiru.

**Table S6.** EPMA data of zircon-hosted sulfides in the early Eocene granite at Jiru.
